# Supplementary material for: Axl Tyrosine Kinase Protects against Tubulo-Interstitial Apoptosis and Progression of Renal Failure in a Murine Model of Chronic Kidney Disease and Hyperphosphataemia
Source: PubMed Central journal article supplement (PMC4096921; doi:10.1371/journal.pone.0102096), 2014-07-14

Figure S1

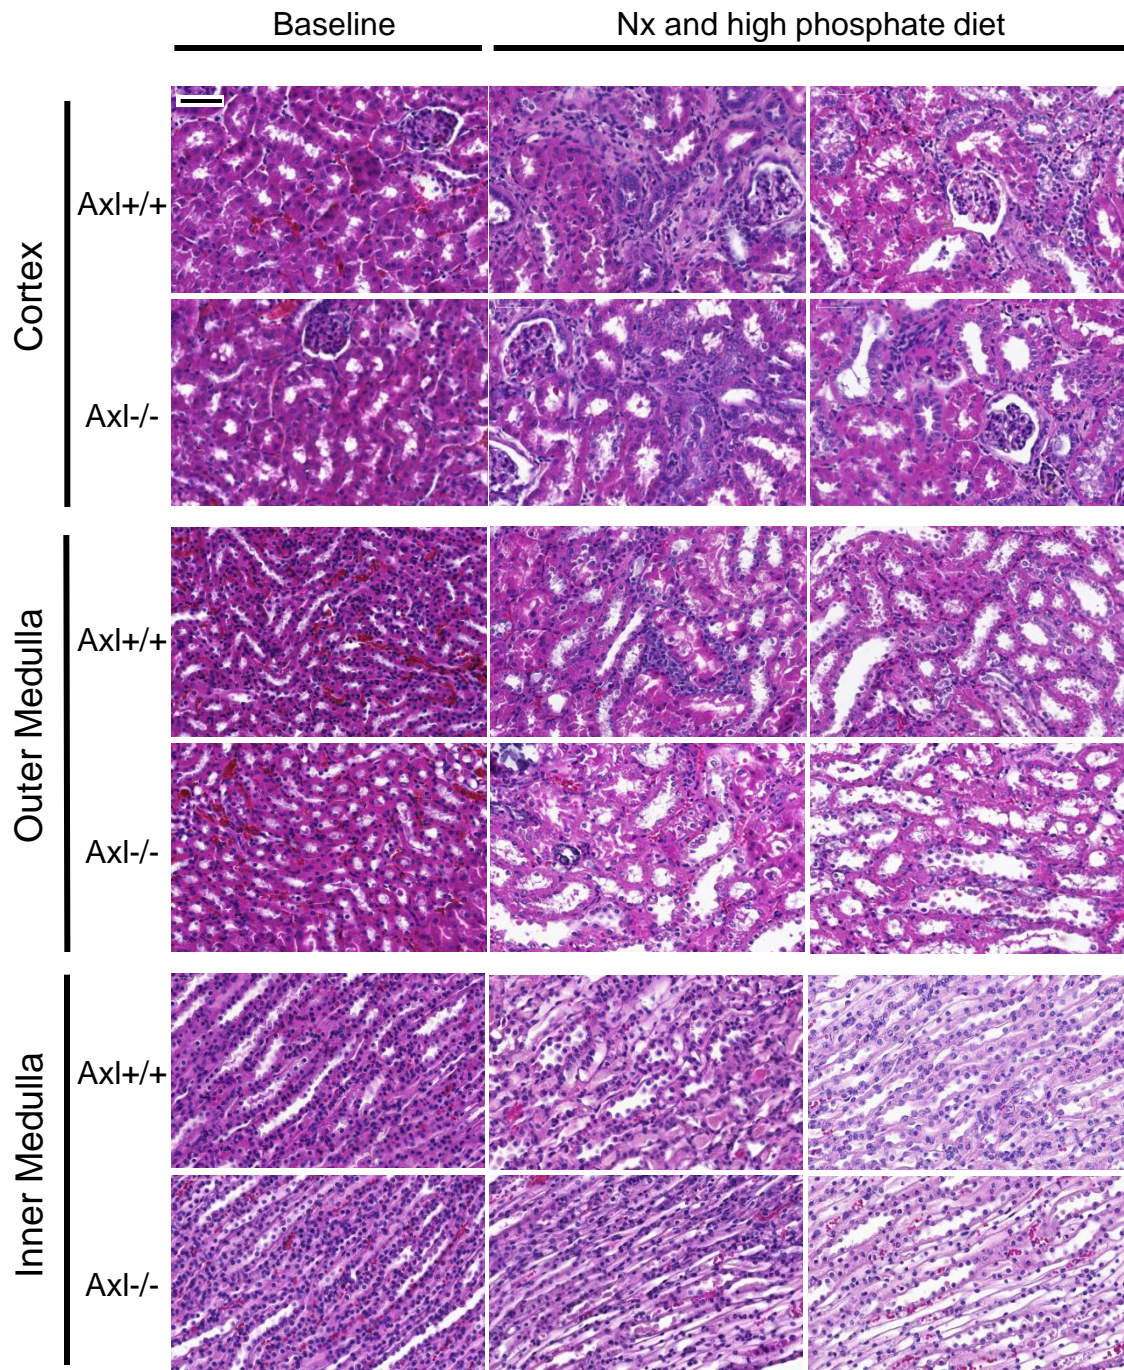

Supplement: pone.0102096.s001.pdf [file pone.0102096.s001.pdf]
