# Supplementary material for: Axl Tyrosine Kinase Protects against Tubulo-Interstitial Apoptosis and Progression of Renal Failure in a Murine Model of Chronic Kidney Disease and Hyperphosphataemia
Source: PubMed Central journal article supplement (PMC4096921; doi:10.1371/journal.pone.0102096), 2014-07-14
Supplement: pone.0102096.s003.pdf [file pone.0102096.s003.pdf]

Figure S3

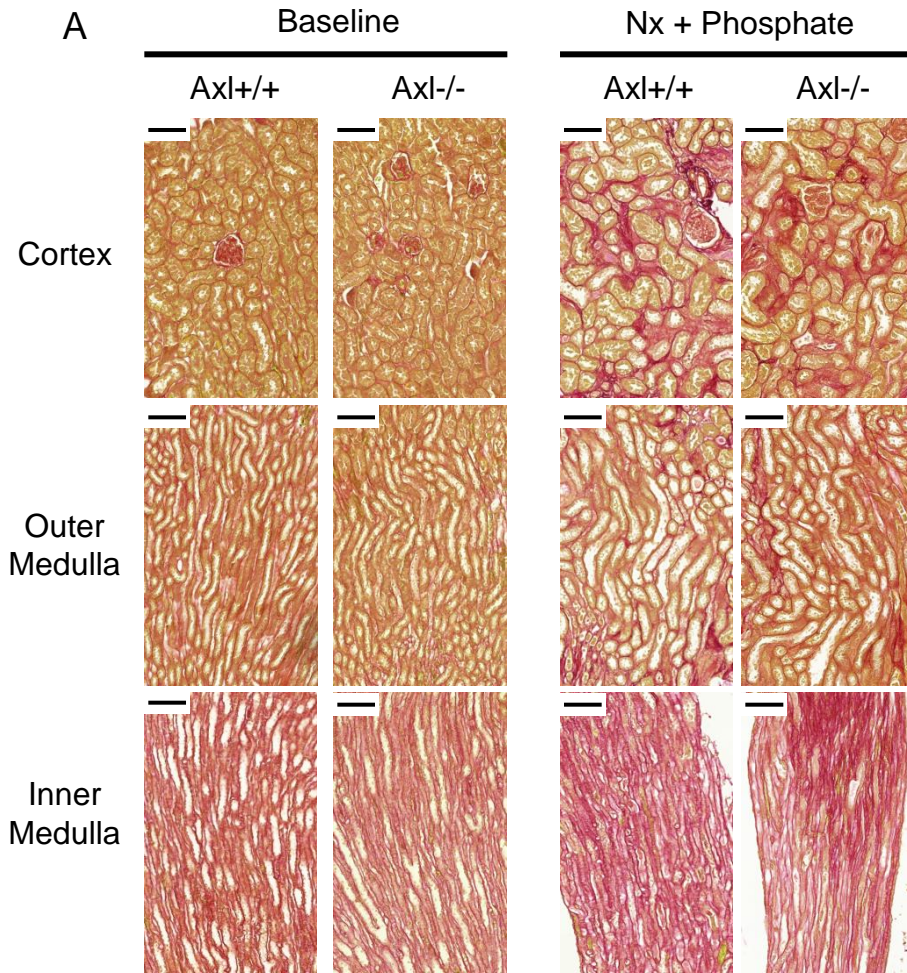

**B**

|        | <b>Cortex</b> | <b>Outer medulla</b> | <b>Inner medulla</b> |
|--------|---------------|----------------------|----------------------|
| Axl+/+ | 46% (6/13)    | 85% (11/13)          | 62% (5/8)            |
| Axl-/- | 60% (9/15)    | 73% (11/15)          | 66% (4/6)            |
